# Supplementary material for: Antimalarial Drug Resistance: Literature Review and Activities and Findings of the ICEMR Network
Source: PubMed Central journal article supplement (PMC4574275; doi:10.4269/ajtmh.15-0007), 2015-09-02
Supplement: SD1.pdf [file SD1.pdf]

SUPPLEMENTAL TABLE 1  
Drug efficacy trials including ACT regimens from the ICEMR countries/regions

| ICEMR       | Specific location                   | Dates of trial | Trial comparison               | Participants (N)           | Risk failure 28 days, uncorrected                                                   | Risk failure 28 days, corrected          | Ref. |
|-------------|-------------------------------------|----------------|--------------------------------|----------------------------|-------------------------------------------------------------------------------------|------------------------------------------|------|
| West Africa | Thies                               | 2011–2013      | AL                             | 147                        | 2/147 (1%)                                                                          | (1%)                                     | –    |
|             | Dioro                               | 2011–2013      | AL                             | 37                         | 12/37 (32%)                                                                         | (0%)                                     | –    |
|             | Gambissara                          | 2011–2013      | AL                             | 25                         | 1/25 (4%)                                                                           | (0%)                                     | –    |
|             | Kampala                             | 2002–2003      | CQ/SP vs. AQ/SP vs. AS/AQ      | 384                        | CQ/SP 56%; AQ/SP 17%; AS/AQ 17%                                                     | CQ/SP 41%; AQ/SP 10%; AS/AQ 4%           | 1    |
| Uganda      | Apac, Arua, Jinja, Tororo           | 2002–2004      | CQ/SP vs. AQ/SP vs. AS/AQ      | 2,160                      | CQ/SP 63–88%; AQ/SP 28–59%; AS/AQ 19–74%                                            | CQ/SP 22–46%; AQ/SP 7–18%; AS/AQ 4–12%   | 2    |
|             | Tororo                              | 2004–2005      | AS/AQ vs. AL                   | 403                        | AS/AQ 66%; AL 51%                                                                   | AS/AQ 0%; AL 1.0%                        | 3    |
|             | Kampala                             | 2004–2006      | AQ/SP vs. AS/AQ vs. AL         | ~200/arm                   | AQ/SP 26.1%; AS/AQ 17.4%; AL 6.7%                                                   | AQ/SP 14.1%; AS/AQ 4.6%; AL 1.0%         | 4    |
|             | Apac                                | 2006           | AL vs. DP                      | 417                        | AL 29%; DP 11%                                                                      | AL 8.9%; DP 1.9%                         | 5    |
|             | Kanungu                             | 2006           | AL vs. DP                      | 408                        | AL 17.3%; DP 3.8%                                                                   | AL 3.2%; DP 0.9%                         | 6    |
|             | Tororo                              | 2007–2008      | AL vs. DP                      | 671                        | AL 35%; DP 11%                                                                      | AL 1.0%; AS/AQ 0.3%                      | 7    |
|             | Kampala                             | 2007–2008      | QN vs. AL                      | 178                        | QN 35.3%; AL 4.1%                                                                   | QN 23.1%; AL 4.1%                        | 8    |
|             | Kampala                             | 2004–2008      | AQ/SP vs. AS/AQ vs. AL         | 1,464                      | AQ/SP 26.7%; AS/AQ 16.1%; AL 6.1%                                                   | AQ/SP 16.0%; AS/AQ 3.5%; AL 0.8%         | 9    |
|             | Tororo                              | 2007–2012      | AL vs. DP                      | 5,564                      | AL 51.0%; DP 8.9%                                                                   | AL 3.7%; DP 4.4% (63 days)               | 10   |
|             | Apac                                | 2013           | AL vs. AS/AQ                   | 100/arm                    | AL 32.0%; AS/AQ 15.0%                                                               | AL 2.1%; AS/AQ 0%                        | –    |
| South Asia  | Mubende                             | 2013           | AL vs. AS/AQ                   | 100/arm                    | AL 54.9%; AS/AQ 35.0%                                                               | AL 4.3%; AS/AQ 0%                        | –    |
|             | Kanungu                             | 2014           | AL vs. AS/AQ                   | 100/arm                    | AL 50.0%; AS/AQ 38.0%                                                               | AL 41.1%; AS/AQ 0%                       | –    |
|             | Jharkhand, Odiisha                  | 2007–2008      | AS/AQ vs. AQ                   | 300                        | AS/AQ 22%; AQ 13%                                                                   | AS/AQ 5–10%; AQ 5%                       | 11   |
|             | Assam, Goa, Karnataka               | 2006–2007      | DP vs. AS/MQ                   | 150                        | DP 10% vs. AS/MQ 18%                                                                | DP 1% vs. AS/MQ 0%                       | 12   |
|             | Goa, Karnataka                      | 2007–2008      | AS/MQ                          | 77                         | AS/MQ 1%                                                                            | AS/MQ 0%                                 | 13   |
|             | Arunachal Pradesh, Tripura, Mizoram | 2012           | AS/SP                          | 169                        | AS/SP 33%                                                                           | AS/SP 20%                                | 14   |
|             | Nine sites                          | 2009–2010      | AS/SP vs. AS/SP/PQ             | 1,335                      | AS/PY 4%; AS/MO 5%                                                                  | –                                        | 15   |
|             | Seven countries                     | 2007–2008      | AS/PY vs. AS/MQ                | 1,271                      | PF: AL 7%, DP 14%, CQ/SP 32%, ART/SP 13%; Pv: AL 51%, DP 16%, CQ/SP 49%, ART/SP 49% | PF: AL 3%, DP 10%, CQ/SP 15%, ART/SP 10% | 16   |
|             | Alexishaven, Kunjimini              | 2006–2008      | AL vs. DP vs. CQ/SP vs. ART/SP | PF: 110–127/arm; Pv: 39–61 | PF: AL 2%, ART/NQ 0%; Pv: AL 35%, ART/NQ 0%                                         | PF: AL 1%, ARCO 0%; Pv: AL 20%, ARCO 0%  | 17   |
|             | Mugil                               | 2011–2013      | AL vs. ART/NQ                  | PF:100/arm; Pv: 20 and 27  | PF: AL 2%, ART/NQ 0%; Pv: AL 35%, ART/NQ 0%                                         | PF: AL 1%, ARCO 0%; Pv: AL 20%, ARCO 0%  | –    |

ACT = artemisinin-based combination therapy; AL = artemether/lumefantrine; AQ = amodiaquine; ARCO = ART/NQ; ART = artesunate; AS = chloroquine; DP = dihydroartemisinin/piperaquine; ICEMR = the International Centers of Excellence for Malaria Research; MQ = mefloquine; NQ = naphthoquine; PNG = Papua New Guinea; PY = pyronaridine; QN = quinine; Ref. = references include both published data (shown below) and unpublished data; SP = sulfadoxine/pyrimethamine.

SUPPLEMENTAL TABLE 2  
Ex vivo/in vitro drug efficacy results from the ICEMR countries/regions

| ICEMR       | Specific location | Date of collection | Source of samples | N    | Assay                  | Mean (or median) IC <sub>50</sub> (nM) |       |       |       |      |      |      |        |        |    | Ref. |
|-------------|-------------------|--------------------|-------------------|------|------------------------|----------------------------------------|-------|-------|-------|------|------|------|--------|--------|----|------|
|             |                   |                    |                   |      |                        | CQ                                     | DEAO  | QN    | LM    | MQ   | PQ   | DHA  | Other  |        |    |      |
| West Africa | Thies             | 2008               | Adult, child      | ~400 | Ex vivo; DAPI assay    | 30.7                                   | 9.6   | NT    | NT    | 34.5 | NT   | NT   | NT     | 18     |    |      |
|             |                   | 2009               |                   |      |                        | 15.0                                   | 6.5   | 176.9 | NT    | 44.6 | NT   | NT   |        |        |    |      |
|             |                   | 2010               |                   |      |                        | 22.4                                   | 11.2  | 45.65 | NT    | 32.6 | NT   | 4.3  |        |        |    |      |
|             |                   | 2011               |                   |      |                        | 76.1                                   | 14.5  | 239.9 | 119   | 42.1 | 101  | 2.1  |        |        |    |      |
| Uganda      | Kampala           | 2006–2008          | Child cohort      | 241  | Ex vivo; HRP ELISA     | 23.8                                   | 6.65  | 182.4 | 316.9 | 38.5 | 20.3 | 2.0  | 19     |        |    |      |
|             |                   |                    |                   |      |                        | 2010–2012                              | 101.1 | 66.4  | 94.4  | 0.51 | –    | 6.1  | 0.55   | 20     |    |      |
|             |                   |                    |                   |      |                        | 2007                                   | 486.2 | 83.3  | 126.4 | 2.7  | –    | 20.3 | 1.7    | 21     |    |      |
|             |                   |                    |                   |      |                        | 2008–2009                              | 115   | –     | –     | –    | –    | –    | –      | 22     |    |      |
| South Asia  | West Bengal       | 2008–2009          | All ages          | 126  | In vitro; hypoxanthine | 54                                     | –     | –     | –     | –    | –    | –    | 23     |        |    |      |
|             |                   |                    |                   |      |                        | 2006–2009                              | 60    | –     | > 500 | –    | –    | –    | –      | 24     |    |      |
|             |                   |                    |                   |      |                        | 2007–2009                              | 51    | –     | –     | 5.9  | 50.4 | –    | 23.0   | AS 5.8 | 25 |      |
|             |                   |                    |                   |      |                        | 2007–2010                              | 63    | –     | –     | –    | –    | 28.4 | –      | –      | 26 |      |
| PNG         | Madang            | 2006–2007          | Community survey  | 64   | Ex vivo; pLDH ELISA    | 167                                    | 19.3  | –     | 5.4   | 11.7 | 11.7 | 2.1  | NQ 7.0 |        |    |      |
|             |                   |                    |                   |      |                        | –                                      | –     | –     | –     | –    | –    | –    | –      |        |    |      |

AS = artesunate; CQ = chloroquine; DAPI = 4',6-diamidino-2-phenylindole; DEAO = desethylamodiaquine; DHA = desethylamodiaquine; ELISA = enzyme-linked immunosorbent assay; HRP = horseradish peroxidase; ICEMR = the International Centers of Excellence for Malaria Research; LM = lumefantrine; MQ = mefloquine; NQ = not tested; PCD = passive case detection; pLDH = *Plasmodium* lactate dehydrogenase; PNG = Papua New Guinea; PQ = piperaquine; QN = quinine; Ref. = references include both published data (shown below) and unpublished data.

SUPPLEMENTAL TABLE 3  
Assessment of drug resistance polymorphisms in samples from the ICEMR countries/regions, transporters

| ICEMR       | Specific location   | Date of collection | Source of samples    | N         | Single nucleotide polymorphism prevalence (%; WT/mixed/mutant) |                    |                     |                      |                      |                      |          |         | Ref. |
|-------------|---------------------|--------------------|----------------------|-----------|----------------------------------------------------------------|--------------------|---------------------|----------------------|----------------------|----------------------|----------|---------|------|
|             |                     |                    |                      |           | <i>Pfcr1</i> K76T                                              | <i>Pfmdr1</i> N86Y | <i>Pfmdr1</i> Y184F | <i>Pfmdr1</i> S1034C | <i>Pfmdr1</i> N1042D | <i>Pfmdr1</i> D1246Y |          |         |      |
| West Africa | Pikine, Thies       | 2008               | –                    | ~700      | 44/3/53                                                        | 88/2/10            | 64/4/32             | 100/0/0              | 75/1/24              | 100/0/0              | 1827     |         |      |
|             |                     | 2009               | –                    |           | 49/5/46                                                        | 81/5/14            | 42/7/51             | 100/0/0              | 82/0/8               | 100/0/0              |          |         |      |
|             |                     | 2010               | –                    |           | 53/6/41                                                        | 84/0/16            | 30/9/61             | 100/0/0              | 90/0/10              | 100/0/0              |          |         |      |
| Zambia      | Choma               | 2011               | –                    |           | 54/3/43                                                        | 89/11/0            | 41/9/50             | Not done             | 89/0/11              | Not done             |          |         |      |
|             |                     | 2006               | All ages, DBS        | 59        | 3,4/10,2/86.4                                                  | –                  | –                   | –                    | –                    | –                    | –        |         |      |
|             |                     | 2008               | –                    | 42        | 23,7/5,3/71.1                                                  | –                  | –                   | –                    | –                    | –                    | –        |         |      |
| Zimbabwe    | Mutasa              | 2009               | –                    | 30        | 37,9/0/62.1                                                    | –                  | –                   | –                    | –                    | –                    |          |         |      |
|             |                     | 2010               | –                    | 70        | 80,0/1,4/18.6                                                  | –                  | –                   | –                    | –                    | –                    |          |         |      |
|             |                     | 2003               | All ages, DBS        | 49        | 33,0/3,0/63.6                                                  | –                  | –                   | –                    | –                    | –                    | –        |         |      |
| Uganda      | Six sites<br>Tororo | 2013               | –                    | 54        | 97,0/0,0/3.0                                                   | –                  | –                   | –                    | –                    | –                    | 28       |         |      |
|             |                     | 2002–2004          | –                    | 2,049     | 2,4/15,0/82.6                                                  | –                  | –                   | –                    | –                    | –                    | 29       |         |      |
|             |                     | 2004–2005          | DBS                  | 201       | –                                                              | 8/30/62            | 90/8/2              | –                    | –                    | 14/48/38             | 30       |         |      |
| South Asia  | Assam               | 2003–2004          | –                    | 79        | 0/1/99                                                         | 10/71/19           | 75/23/2             | –                    | –                    | –                    |          |         |      |
|             |                     | 2005               | –                    | 201       | 0/0/100                                                        | 9/38/53            | 85/14/1             | –                    | –                    | 2/48/50              |          |         |      |
|             |                     | 2007               | –                    | 39        | 0/0/100                                                        | 32/19/49           | 68/19/13            | –                    | –                    | 17/40/43             |          |         |      |
|             |                     | 2008               | –                    | 147       | 0/2/98                                                         | 23/61/16           | 71/15/14            | –                    | –                    | 23/31/46             |          |         |      |
|             |                     | 2009               | –                    | 96        | 4/2/94                                                         | 23/27/44           | 83/7/10             | –                    | –                    | 24/34/42             |          |         |      |
|             |                     | 2010               | –                    | 111       | 0/4/96                                                         | 44/37/19           | 37/41/22            | –                    | –                    | 17/23/60             |          |         |      |
|             |                     | 2011               | –                    | 111       | 0/8/92                                                         | 47/37/16           | 59/7/34             | –                    | –                    | 19/50/31             |          |         |      |
|             |                     | 2012               | –                    | 79        | 17/16/67                                                       | 51/41/8            | 68/6/26             | –                    | –                    | 20/48/32             |          |         |      |
|             |                     | 2006–2008          | All ages, PHC        | 200       | 0/1/99                                                         | 30/-/68            | –                   | –                    | –                    | –                    | 53/34/13 | 31      |      |
|             |                     | 2006–2008          | –                    | 65        | 15/-/50                                                        | 15/-/50            | –                   | –                    | –                    | –                    | –        | 21      |      |
|             |                     | 2008–2009          | All ages             | 50        | 0/-/50                                                         | 0/-/50             | –                   | –                    | –                    | –                    | –        | 21      |      |
|             |                     | Southeast Asia     | China–Myanmar border | 2008–2009 | All ages                                                       | 126                | 45/-/55             | 39/-/61              | 100/-/0              | 34/-/66              | 100/-/0  | 54/0/46 | 22   |
| 2004–2006   | All ages, PHC       |                    |                      | 104       | 5/-/95                                                         | 19/-/81            | 35/0/65             | –                    | –                    | –                    | 32       |         |      |
| 2008        | Community           |                    |                      | 48        | 0/3/97                                                         | –                  | –                   | –                    | –                    | –                    | –        | 33      |      |
| 2007–2009   | PHC                 | 204                | –                    | 2         | 27.5                                                           | –                  | –                   | 7.8                  | –                    | 24                   |          |         |      |
| 2007–2010   | PHC                 | 63                 | 100                  | 1.6       | 25.4                                                           | –                  | –                   | 6.3                  | –                    | 25                   |          |         |      |

DBS = dry blood spots; ICEMR = the International Centers of Excellence for Malaria Research; PHC = public health center; Ref. = references include both published data (shown below) and unpublished data; WT = wild type.

SUPPLEMENTAL TABLE 4  
Assessment of drug resistance polymorphisms in samples from the ICEMR countries/regions, antifoilates

| ICEMR/region   | Specific location                                                                 | Date of collection | N     | Single nucleotide polymorphism prevalence (%; WT/mixed/mutant) |                |                |                        |              |                |                 |                 |                |            | Ref.    |          |       |
|----------------|-----------------------------------------------------------------------------------|--------------------|-------|----------------------------------------------------------------|----------------|----------------|------------------------|--------------|----------------|-----------------|-----------------|----------------|------------|---------|----------|-------|
|                |                                                                                   |                    |       | <i>Pf</i> dhfr                                                 |                |                |                        |              | <i>Pf</i> dhps |                 |                 |                |            |         |          |       |
|                |                                                                                   |                    |       | A16V                                                           | N51I           | C59R           | S108N (°T)             | I164L        | S436A          | A437G           | K540E           | A581G          | A613T/S    |         |          |       |
| West Africa    | Pikine, Thies                                                                     | 2003               | 700   | -                                                              | 47/13/40       | 46/13/41       | 26/7/67                | 100/0/0      | 77/1/4/9       | 26/6/67         | 100/0/0         | 100/0/0        | 100/0/0    | 100/0/0 | 18,27,34 |       |
|                |                                                                                   | 2008               | -     | 8/4/88                                                         | 7.8/3.2/89     | 3/2/95         | 100/0/0                | 74/3/23      | 79/1/20        | 100/0/0         | 100/0/0         | 100/0/0        | 100/0/0    | 100/0/0 |          |       |
|                |                                                                                   | 2009               | -     | 7/6/87                                                         | 7.6/87         | 23/1/76        | 100/0/0                | 74/3/23      | 70/1/29        | 100/0/0         | 100/0/0         | 100/0/0        | 100/0/0    | 100/0/0 | 100/0/0  |       |
|                |                                                                                   | 2010               | -     | 6/6/88                                                         | 6/6/88         | 9/3/88         | 100/0/0                | 86/1/13      | 36/1/63        | 100/0/0         | 100/0/0         | 100/0/0        | 100/0/0    | 100/0/0 | 100/0/0  |       |
|                |                                                                                   | 2011               | -     | 0/7/93                                                         | 0/3/97         | 0/4/96         | 100/0/0                | 97/1/2       | 36/7/57        | 100/0/0         | 100/0/0         | 100/0/0        | 100/0/0    | 100/0/0 | 100/0/0  |       |
|                |                                                                                   | 2012               | -     | 2/15/83                                                        | 2/16/82        | 1/95.8/3.2     | 100/0/0                | 90/1/9       | 36/5/54        | 100/0/0         | 100/0/0         | 100/0/0        | 100/0/0    | 100/0/0 | 100/0/0  | 35,36 |
| Zambia         | -                                                                                 | 2000               | 49    | 100/0/0                                                        | -              | 44.9/0.0/55.1  | 49.0/0.0/51.2          | 100/0/0      | 93.9/0/6.1     | 60.6/0.0/39.4   | 93.5/0.0/6.5    | 100/0/0        | 100/0/0    | 100/0/0 |          |       |
|                |                                                                                   | 2003               | 25    | 100/0/0                                                        | 32.0/0.0/68.0  | 44.0/0.0/56.0  | 16.0/0.0/84.0          | 100/0/0      | 92/0/8         | 64.7/0.0/35.3   | 88.0/0.0/12.0   | 100/0/0        | 100/0/0    | 100/0/0 |          |       |
|                |                                                                                   | 2006               | 136   | 1.5/0/98.5                                                     | 20.8/4.8/74.4  | 40.3/8.5/51.2  | 5.9/8.1(1.5)/80.9(3.8) | 100/0/0      | 92.9/0/7.1     | 78.6/0.0/21.4   | 83.9/0.0/16.1   | 100/0/0        | 100/0/0    | 100/0/0 |          |       |
|                |                                                                                   | 2012               | 3,000 | -                                                              | 0.77/0.64/98.6 | 1.19/3.14/95.0 | 0.28/2.02/97.7         | 99.66/0.34/0 | 99.4/0.4/0.2   | 1.09/1.66/97.24 | 2.38/1.19/96.44 | 95.72/1.62/0.8 | 91.3/8.7/0 | -       |          |       |
| Uganda         | Southern region<br>Kampala<br>Six sites<br>Tororo                                 | 1998-2003          | 812   | -                                                              | 8/4/88         | 34/20/56       | 2/12/88                | -            | -              | 24/22/64        | 20/20/60        | -              | -          | -       | 37       |       |
|                |                                                                                   | 2002-2004          | 2,049 | -                                                              | 0.4/3.1/96.5   | 19.8/24.3/55.8 | 0/0.4/99.6             | 99.8/0.2/0   | -              | 9.2/14.2/76.6   | 10.8/19.0/70.2  | -              | -          | -       | 28       |       |
|                |                                                                                   | 2003-2004          | 79    | -                                                              | 0/6/94         | 7/37/56        | 0/0/100                | 80/0/0       | -              | 2/14/84         | 2/26/72         | 100/0/0        | -          | -       | 30       |       |
|                |                                                                                   | 2005               | 201   | -                                                              | 1/2/97         | 7/31/62        | 1/2/97                 | 99/1/0       | -              | 2/12/86         | 1/13/86         | 98/1/1         | -          | -       |          |       |
|                |                                                                                   | 2007               | 39    | 0/0/100                                                        | 8/3/89         | 8/3/89         | 0/59/41                | 100/0/0      | 0/0/100        | 0/0/100         | 0/0/100         | 100/0/0        | 100/0/0    | 100/0/0 |          |       |
|                |                                                                                   | 2008               | 147   | 1/0/99                                                         | 3/6/91         | 7/3/90         | 0/23/77                | 99/1/0       | 91/8/1         | 1/1/98          | 0/4/96          | 88/11/1        | 88/11/1    | 88/11/1 |          |       |
|                |                                                                                   | 2009               | 96    | 1/0/99                                                         | 9/11/80        | 1/16/83        | 0/11/89                | 91/8/1       | 1/1/98         | 1/1/98          | 0/4/96          | 89/10/1        | 89/10/1    | 89/10/1 |          |       |
|                |                                                                                   | 2010               | 111   | 0/1/99                                                         | 9/11/80        | 1/16/83        | 0/11/89                | 88/11/1      | 1/2/97         | 1/4/95          | 87/4/9          | 88/8/4         | 88/8/4     | 88/8/4  |          |       |
|                |                                                                                   | 2011               | 111   | 0/0/100                                                        | 4/13/83        | 0/9/91         | 0/9/91                 | 100/0/0      | 1/1/98         | 1/1/98          | 0/4/96          | 98/2/0         | 98/2/0     | 98/2/0  | 38       |       |
|                |                                                                                   | 2012               | 79    | 0/0/100                                                        | 8/6/86         | 0/2/98         | 0/2/98                 | 100/0/0      | 97/0/3         | 100/0/0         | 91/0/9          | 100/0/0        | 100/0/0    | 100/0/0 |          |       |
| South Asia     | Uttar Pradesh<br>Assam<br>Assam<br>Madhya Pradesh<br>Goa<br>Car Nicobar<br>Island | 2003-2004          | 35    | 100/0/0                                                        | 97/0/3         | 24/0/66        | 3/0/97                 | 97/0/3       | 100/0/0        | 91/0/9          | 100/0/0         | 100/0/0        | 100/0/0    | 100/0/0 | 38       |       |
|                |                                                                                   | 2003-2004          | 37    | 100/0/0                                                        | 86/0/14        | 8/0/92         | 8/0/92                 | 92/0/08      | 78/0/22        | 68/0/32         | 78/0/22         | 95/0/5         | 100/0/0    | 100/0/0 | 38       |       |
|                |                                                                                   | 2006-2008          | 200   | 99/0/1                                                         | 80/0/20        | 3/0/97         | 0/0/100                | 86/0/14      | 75/0/25        | 40/0/60         | 79/0/21         | 61/0/39        | 76/0/22    | 76/0/22 | 31       |       |
|                |                                                                                   | 2004-2006          | 104   | -                                                              | -              | 22/-/78        | 12/0/88                | -            | -              | -88/-/12        | 96/-/4          | 97/0/3         | -          | -       | 32       |       |
|                |                                                                                   | 2012-2013          | 50    | 29/-/71                                                        | -              | -              | 19/-/81                | -            | 100/-/0        | 78/0/22         | 100/-/0         | 100/-/0        | 100/-/0    | 100/-/0 | -        |       |
|                |                                                                                   | 2003-2004          | 33    | 100/0/0                                                        | 10/0/90        | 0/0/100        | 0/0/100                | 12/0/88      | 54/0/46        | 20/0/80         | 80/0/20         | 80/0/20        | 80/0/20    | 100/0/0 | 100/0/0  | 39    |
| Southeast Asia | China-Myanmar border                                                              | 2010               | 117   | 0                                                              | 63.2           | 99.1           | 99.1                   | 78.6         | 62.3           | 98.3            | 87.2            | 37.6           | 0          | 0       | 40       |       |

ICEMR = the International Centers of Excellence for Malaria Research; PHC = public health center; Ref. = references include both published data (shown below) and unpublished data; WT = wild type.

## SUPPLEMENTAL REFERENCES

1. Staedke SG, Mpimbaza A, Kanya MR, Nzarubara BK, Dorsey G, Rosenthal PJ, 2004. Combination treatments for uncomplicated falciparum malaria in Kampala, Uganda: randomised clinical trial. *Lancet* 364: 1950–1957.
2. Yeka A, Banek K, Bakyaita N, Staedke SG, Kanya MR, Talisuna A, Kironde F, Nsobya SL, Kilian A, Slater M, Reingold A, Rosenthal PJ, Wabwire-Mangen F, Dorsey G, 2005. Artemisinin versus nonartemisinin combination therapy for uncomplicated malaria: randomized clinical trials from four sites in Uganda. *PLoS Med* 2: e190.
3. Bukirwa H, Yeka A, Kanya MR, Talisuna A, Banek K, Bakyaita N, Rwakimari JB, Rosenthal PJ, Wabwire-Mangen F, Dorsey G, Staedke SG, 2006. Artemisinin combination therapies for treatment of uncomplicated malaria in Uganda. *PLoS Clin Trials* 1: e7.
4. Dorsey G, Staedke S, Clark TD, Njama-Meya D, Nzarubara B, Maiteki-Sebuguzi C, Dokomajilar C, Kanya MR, Rosenthal PJ, 2007. Combination therapy for uncomplicated falciparum malaria in Ugandan children: a randomized trial. *JAMA* 297: 2210–2219.
5. Kanya MR, Yeka A, Bukirwa H, Lugemwa M, Rwakimari JB, Staedke SG, Talisuna AO, Greenhouse B, Nosten F, Rosenthal PJ, Wabwire-Mangen F, Dorsey G, 2007. Artemether-lumefantrine versus dihydroartemisinin-piperaquine for treatment of malaria: a randomized trial. *PLoS Clin Trials* 2: e20.
6. Yeka A, Dorsey G, Kanya MR, Talisuna A, Lugemwa M, Rwakimari JB, Staedke SG, Rosenthal PJ, Wabwire-Mangen F, Bukirwa H, 2008. Artemether-lumefantrine versus dihydroartemisinin-piperaquine for treating uncomplicated malaria: a randomized trial to guide policy in Uganda. *PLoS One* 3: e2390.
7. Arinaitwe E, Sandison TG, Wanzira H, Kakuru A, Homsy J, Kalamya J, Kanya MR, Vora N, Greenhouse B, Rosenthal PJ, Tappero J, Dorsey G, 2009. Artemether-lumefantrine versus dihydroartemisinin-piperaquine for falciparum malaria: a longitudinal, randomized trial in young Ugandan children. *Clin Infect Dis* 49: 1629–1637.
8. Achan J, Tibenderana JK, Kyabayinze D, Wabwire Mangen F, Kanya MR, Dorsey G, D'Alessandro U, Rosenthal PJ, Talisuna AO, 2009. Effectiveness of quinine versus artemether-lumefantrine for treating uncomplicated falciparum malaria in Ugandan children: randomised trial. *BMJ* 339: b2763.
9. Clark TD, Njama-Meya D, Nzarubara B, Maiteki-Sebuguzi C, Greenhouse B, Staedke SG, Kanya MR, Dorsey G, Rosenthal PJ, 2010. Incidence of malaria and efficacy of combination antimalarial therapies over 4 years in an urban cohort of Ugandan children. *PLoS One* 5: e11759.
10. Wanzira H, Kakuru A, Arinaitwe E, Bigira V, Muhindo MK, Conrad M, Rosenthal PJ, Kanya MR, Tappero JW, Dorsey G, 2014. Longitudinal outcomes in a cohort of Ugandan children randomized to artemether-lumefantrine versus dihydroartemisinin-piperaquine for the treatment of malaria. *Clin Infect Dis* 59: 509–516.
11. Anvikar AR, Sharma B, Shahi BH, Tyagi PK, Bose TK, Sharma SK, Srivastava P, Srivastava B, Kiechel JR, Dash AP, Valecha N, 2012. Artesunate-amodiaquine fixed dose combination for the treatment of *Plasmodium falciparum* malaria in India. *Malar J* 11: 97.
12. Gargano N, Ubben D, Tommasini S, Bacchieri A, Corsi M, Bhattacharyya PC, Rao BH, Dubashi N, Dev V, Ghosh SK, Kumar A, Srivastava B, Valecha N, 2012. Therapeutic efficacy and safety of dihydroartemisinin-piperaquine versus artesunate-mefloquine in uncomplicated *Plasmodium falciparum* malaria in India. *Malar J* 11: 233.
13. Valecha N, Srivastava B, Dubhashi NG, Rao BH, Kumar A, Ghosh SK, Singh JP, Kiechel JR, Sharma B, Jullien V, Dash AP, Taylor WR, Anvikar AR, 2013. Safety, efficacy and population pharmacokinetics of fixed-dose combination of artesunate-mefloquine in the treatment of acute uncomplicated *Plasmodium falciparum* malaria in India. *J Vector Borne Dis* 50: 258–264.
14. Mishra N, Kaitholia K, Srivastava B, Shah NK, Narayan JP, Dev V, Phookan S, Anvikar AR, Rana R, Bharti RS, Sonal GS, Dhariwal AC, Valecha N, 2014. Declining efficacy of artesunate plus sulphadoxine-pyrimethamine in northeastern India. *Malar J* 13: 284.
15. Shah NK, Schapira A, Juliano JJ, Srivastava B, Macdonald PD, Poole C, Anvikar A, Meshnick SR, Valecha N, Mishra N, 2013. Nonrandomized controlled trial of artesunate plus sulfadoxine-pyrimethamine with or without primaquine for preventing posttreatment circulation of *Plasmodium falciparum* gametocytes. *Antimicrob Agents Chemother* 57: 2948–2954.
16. Rueangweerayut R, Phyo AP, Uthaisin C, Poravuth Y, Binh TQ, Tinto H, Penali LK, Valecha N, Tien NT, Abdulla S, Borghini-Fuhrer I, Duparc S, Shin CS, Fleckenstein L, 2012. Pyronaridine-artesunate versus mefloquine plus artesunate for malaria. *N Engl J Med* 366: 1298–1309.
17. Karunajeewa HA, Mueller I, Senn M, Lin E, Law I, Gomorrai PS, Oa O, Griffin S, Kotab K, Suano P, Tarongka N, Ura A, Lautu D, Page-Sharp M, Wong R, Salman S, Siba P, Ilett KF, Davis TM, 2008. A trial of combination antimalarial therapies in children from Papua New Guinea. *N Engl J Med* 359: 2545–2557.
18. Van Tyne D, Dieye B, Valim C, Daniels RF, Sene PD, Lukens AK, Ndiaye M, Bei AK, Ndiaye YD, Hamilton EJ, Ndir O, Mboup S, Volkman SK, Wirth DF, Ndiaye D, 2013. Changes in drug sensitivity and anti-malarial drug resistance mutations over time among *Plasmodium falciparum* parasites in Senegal. *Malar J* 12: 441.
19. Nsobya SL, Kiggundu M, Nanyunja S, Joloba M, Greenhouse B, Rosenthal PJ, 2010. In vitro sensitivities of *Plasmodium falciparum* to different antimalarial drugs in Uganda. *Antimicrob Agents Chemother* 54: 1200–1206.
20. Ochong E, Tumwebaze PK, Byaruhanga O, Greenhouse B, Rosenthal PJ, 2013. Fitness consequences of *Plasmodium falciparum* *pfmdr1* polymorphisms inferred from *ex vivo* culture of Ugandan parasites. *Antimicrob Agents Chemother* 57: 4245–4251.
21. Shrivastava SK, Gupta RK, Mahanta J, Dubey ML, 2014. Correlation of molecular markers, *Pfmdr1-N86Y* and *Pfprt-K76T*, with in vitro chloroquine resistant *Plasmodium falciparum*, isolated in the malaria endemic states of Assam and Arunachal Pradesh, northeast India. *PLoS One* 9: e103848.
22. Das S, Mahapatra SK, Tripathy S, Chattopadhyay S, Dash SK, Mandal D, Das B, Hati AK, Roy S, 2014. Double mutation in the *pfmdr1* gene is associated with emergence of chloroquine-resistant *Plasmodium falciparum* malaria in eastern India. *Antimicrob Agents Chemother* 58: 5909–5915.
23. Meng H, Zhang R, Yang H, Fan Q, Su X, Miao J, Cui L, Yang Z, 2010. In vitro sensitivity of *Plasmodium falciparum* clinical isolates from the China–Myanmar border area to quinine and association with polymorphism in the Na<sup>+</sup>/H<sup>+</sup> exchanger. *Antimicrob Agents Chemother* 54: 4306–4313.
24. Wang Z, Parker D, Meng H, Wu L, Li J, Zhao Z, Zhang R, Fan Q, Wang H, Cui L, Yang Z, 2012. In vitro sensitivity of *Plasmodium falciparum* from China–Myanmar border area to major ACT drugs and polymorphisms in potential target genes. *PLoS One* 7: e30927.
25. Hao M, Jia D, Li Q, He Y, Yuan L, Xu S, Chen K, Wu J, Shen L, Sun L, Zhao H, Yang Z, Cui L, 2013. In vitro sensitivities of *Plasmodium falciparum* isolates from the China–Myanmar border to piperaquine and association with polymorphisms in candidate genes. *Antimicrob Agents Chemother* 57: 1723–1729.
26. Wong RP, Lautu D, Tavul L, Hackett SL, Siba P, Karunajeewa HA, Ilett KF, Mueller I, Davis TM, 2006. In vitro sensitivity of *Plasmodium falciparum* to conventional and novel antimalarial drugs in Papua New Guinea. *Trop Med Int Health* 15: 342–349.
27. Daniels R, Ndiaye D, Wall M, McKinney J, Sene PD, Sabeti PC, Volkman SK, Mboup S, Wirth DF, 2012. Rapid, field-deployable method for genotyping and discovery of single-nucleotide polymorphisms associated with drug resistance in *Plasmodium falciparum*. *Antimicrob Agents Chemother* 56: 2976–2986.
28. Francis D, Nsobya SL, Talisuna A, Yeka A, Kanya MR, Machezano R, Dokomajilar C, Rosenthal PJ, Dorsey G, 2006. Geographic differences in antimalarial drug efficacy in Uganda are explained by differences in endemicity and not by

- known molecular markers of drug resistance. *J Infect Dis* 193: 978–986.
29. Dokomajilar C, Nsohya SL, Greenhouse B, Rosenthal PJ, Dorsey G, 2006. Selection of *Plasmodium falciparum* *pfmdr1* alleles following therapy with artemether-lumefantrine in an area of Uganda where malaria is highly endemic. *Antimicrob Agents Chemother* 50: 1893–1895.
  30. Mbogo GW, Nankoberanyi S, Tukwasibwe S, Baliraine FN, Nsohya SL, Conrad MD, Arinaitwe E, Kanya M, Tappero J, Staedke SG, Dorsey G, Greenhouse B, Rosenthal PJ, 2014. Temporal changes in prevalence of molecular markers mediating antimalarial drug resistance in a high malaria transmission setting in Uganda. *Am J Trop Med Hyg* 91: 54–61.
  31. Mohapatra PK, Sarma DK, Prakash A, Bora K, Ahmed MA, Sarma B, Goswami BK, Bhattacharyya DR, Mahanta J, 2014. Molecular evidence of increased resistance to anti-folate drugs in *Plasmodium falciparum* in north-east India: a signal for potential failure of artemisinin plus sulphadoxine-pyrimethamine combination therapy. *PLoS One* 9: e105562.
  32. Mixson-Hayden T, Jain V, McCollum AM, Poe A, Nagpal AC, Dash AP, Stiles JK, Udhayakumar V, Singh N, 2010. Evidence of selective sweeps in genes conferring resistance to chloroquine and pyrimethamine in *Plasmodium falciparum* isolates in India. *Antimicrob Agents Chemother* 54: 997–1006.
  33. Das MK, Lumb V, Mitra P, Singh SS, Dash AP, Sharma YD, 2010. High chloroquine treatment failure rates and predominance of mutant genotypes associated with chloroquine and antifolate resistance among falciparum malaria patients from the island of Car Nicobar, India. *J Antimicrob Chemother* 65: 1258–1261.
  34. Ndiaye D, Dieye B, Ndiaye YD, Van Tyne D, Daniels R, Bei AK, Mbaye A, Valim C, Lukens A, Mboup S, Ndir O, Wirth DF, Volkman S, 2013. Polymorphism in *dhfr/dhps* genes, parasite density and ex vivo response to pyrimethamine in *Plasmodium falciparum* malaria parasites in Thies, Senegal. *Int J Parasitol Drugs Drug Resist* 3: 135–142.
  35. Mharakurwa S, Kumwenda T, Mkulama MA, Musapa M, Chishimba S, Shiff CJ, Sullivan DJ, Thuma PE, Liu K, Agre P, 2011. Malaria antifolate resistance with contrasting *Plasmodium falciparum* dihydrofolate reductase (DHFR) polymorphisms in humans and *Anopheles* mosquitoes. *Proc Natl Acad Sci USA* 108: 18796–18801.
  36. Mkulama MA, Chishimba S, Sikalima J, Rouse P, Thuma PE, Mharakurwa S, 2008. Escalating *Plasmodium falciparum* antifolate drug resistance mutations in Macha, rural Zambia. *Malar J* 7: 87.
  37. Dorsey G, Dokomajilar C, Kiggundu M, Staedke SG, Kanya MR, Rosenthal PJ, 2004. Principal role of dihydropteroate synthase mutations in mediating resistance to sulfadoxine-pyrimethamine in single-drug and combination therapy of uncomplicated malaria in Uganda. *Am J Trop Med Hyg* 71: 758–763.
  38. Ahmed A, Lumb V, Das MK, Dev V, Wajihullah, Sharma YD, 2006. Prevalence of mutations associated with higher levels of sulfadoxine-pyrimethamine resistance in *Plasmodium falciparum* isolates from Car Nicobar Island and Assam, India. *Antimicrob Agents Chemother* 50: 3934–3938.
  39. Lumb V, Das MK, Mitra P, Ahmed A, Kumar M, Kaur P, Dash AP, Singh SS, Sharma YD, 2009. Emergence of an unusual sulfadoxine-pyrimethamine resistance pattern and a novel K540N mutation in dihydropteroate synthetase in *Plasmodium falciparum* isolates obtained from Car Nicobar Island, India, after the 2004 Tsunami. *J Infect Dis* 199: 1064–1073.
  40. Yang Z, Li C, Miao M, Zhang Z, Sun X, Meng H, Li J, Fan Q, Cui L, 2011. Multidrug-resistant genotypes of *Plasmodium falciparum*, Myanmar. *Emerg Infect Dis* 17: 498–501.
